# Supplementary material for: A Filifactor alocis-centered co-occurrence group associates with periodontitis across different oral habitats
Source: PubMed Central journal article supplement (PMC4356962; doi:10.1038/srep09053), 2015-03-12
Supplement: srep09053-s1.pdf [file srep09053-s1.pdf]

# **A *Filifactor alocis*-centered co-occurrence group associates with periodontitis across different oral habitats**

Hui Chen<sup>1</sup>, Ying Liu<sup>2</sup>, Menghui Zhang<sup>1</sup>, Guoyang Wang<sup>3</sup>, Zhengnan Qi<sup>2</sup>, Laura Bridgewater<sup>4</sup>,  
5 Liping Zhao<sup>1,3</sup>, Zisheng Tang<sup>2\*</sup> and Xiaoyan Pang<sup>1\*</sup>

## **Files in this data supplement**

Supplementary Table S1

Supplementary Table S2

10 Supplementary Table S3

Supplementary Table S4

Supplementary Table S5

Supplementary Table S6

Supplementary Table S7

15 Supplementary Figure S1

Supplementary Figure S2

Supplementary Figure S3

## **Supplementary Tables and Figures**

20 **Supplementary Table S1** Diversity indices of the microbiota in five oral habitat sample groups. Values are shown as mean  $\pm$  SD. Diversity indices marked with different superscript letters are significantly different from each other (ANOVA,  $P < 0.05$ ).

|                           | H-Sal                           | P-Sal                             | H-Sup                           | P-Sup                           | P-Sub                             |
|---------------------------|---------------------------------|-----------------------------------|---------------------------------|---------------------------------|-----------------------------------|
| Shannon diversity index   | 3.48 $\pm$ 0.41 <sup>c</sup>    | 3.81 $\pm$ 0.33 <sup>b</sup>      | 3.85 $\pm$ 0.22 <sup>b</sup>    | 4.10 $\pm$ 0.20 <sup>a</sup>    | 3.80 $\pm$ 0.32 <sup>b</sup>      |
| Simpson's diversity index | 0.93 $\pm$ 0.04 <sup>b</sup>    | 0.95 $\pm$ 0.02 <sup>a</sup>      | 0.96 $\pm$ 0.01 <sup>a</sup>    | 0.97 $\pm$ 0.01 <sup>a</sup>    | 0.93 $\pm$ 0.05 <sup>b</sup>      |
| Rarefaction               | 113.37 $\pm$ 22.61 <sup>d</sup> | 139.75 $\pm$ 21.90 <sup>b,c</sup> | 127.70 $\pm$ 16.65 <sup>c</sup> | 154.82 $\pm$ 18.53 <sup>a</sup> | 151.80 $\pm$ 13.96 <sup>a,b</sup> |
| Chao1                     | 178.91 $\pm$ 33.10 <sup>d</sup> | 220.18 $\pm$ 30.80 <sup>b,c</sup> | 205.14 $\pm$ 31.10 <sup>c</sup> | 253.83 $\pm$ 46.48 <sup>a</sup> | 231.71 $\pm$ 24.22 <sup>a,b</sup> |

**Supplementary Table S2** Oral taxa commonly shared in the microbiota of saliva, supra and subgingival plaque in all individuals.

| Taxa                                                                | Relative contribution (%) <sup>1</sup> | Relative abundance (%) (median, range) |                 |                 |                 |                 |
|---------------------------------------------------------------------|----------------------------------------|----------------------------------------|-----------------|-----------------|-----------------|-----------------|
|                                                                     |                                        | H-Sal                                  | P-Sal           | H-Sup           | P-Sup           | P-Sub           |
| <b>Genus level</b>                                                  |                                        |                                        |                 |                 |                 |                 |
| <i>Streptococcus</i>                                                | 8.60                                   | 17.4, 6.49-31.3                        | 14.4, 3.61-29.7 | 4.18, 1.88-14.2 | 3.88, 1.30-8.91 | 1.33, 0.27-4.16 |
| <i>Leptotrichia</i>                                                 | 6.87                                   | 2.67, 0.83-11.5                        | 2.56, 0.86-8.25 | 10.4, 1.40-19.6 | 10.6, 6.66-17.7 | 4.95, 0.74-16.7 |
| <i>Actinomyces</i>                                                  | 3.43                                   | 3.42, 0.59-9.89                        | 3.39, 1.15-12.1 | 3.32, 0.69-16.3 | 2.32, 0.27-13.5 | 1.76, 0.42-13.9 |
| <i>Prevotella</i>                                                   | 14.05                                  | 10.0, 2.15-34.7                        | 13.8, 3.17-37.8 | 9.77, 1.11-24.0 | 16.8, 3.54-36.8 | 14.2, 3.37-28.3 |
| <i>Porphyromonas</i>                                                | 11.40                                  | 5.73, 0.94-30.9                        | 9.32, 1.09-21.3 | 5.57, 0.80-16.4 | 6.67, 2.01-17.7 | 26.3, 1.70-53.5 |
| <i>Capnocytophaga</i>                                               | 6.97                                   | 2.72, 0.37-8.51                        | 1.50, 0.40-7.87 | 14.8, 7.32-27.6 | 9.05, 6.47-27.6 | 3.52, 1.37-15.6 |
| <i>Fusobacterium</i>                                                | 4.22                                   | 2.57, 0.67-5.88                        | 3.21, 1.05-6.25 | 3.44, 1.06-7.90 | 4.79, 1.56-7.95 | 6.25, 0.73-12.2 |
| <i>TM7_genera_incertae_sedis</i>                                    | 1.38                                   | 0.71, 0.21-2.66                        | 1.06, 0.22-2.97 | 1.05, 0.19-4.48 | 1.73, 0.14-5.73 | 1.44, 0.24-3.34 |
| <i>Clostridium XIVa</i>                                             | 1.05                                   | 0.96, 0.41-4.54                        | 1.16, 0.08-6.41 | 0.65, 0.09-3.59 | 0.97, 0.28-2.60 | 0.50, 0.05-2.70 |
| <b>OTU level</b>                                                    |                                        |                                        |                 |                 |                 |                 |
| OTU0039: <i>Streptococcus</i> sp. HOT_734 [HOT_707 HOT_677 HOT_638] | 5.49                                   | 10.8, 1.43-27.1                        | 8.60, 2.18-24.7 | 2.89, 0.70-10.7 | 2.07, 0.37-6.37 | 0.87, 0.20-2.42 |
| OTU0202: <i>Leptotrichia buccalis</i> HOT_563                       | 3.45                                   | 1.35, 0.19-5.48                        | 1.29, 0.30-3.83 | 5.36, 0.70-11.4 | 5.37, 2.96-10.1 | 2.85, 0.31-6.81 |
| OTU0288: <i>Prevotella</i> sp. HOT_317                              | 2.98                                   | 0.45, 0.04-2.24                        | 1.10, 0.16-8.11 | 3.43, 0.13-7.47 | 5.22, 1.09-11.0 | 3.13, 0.74-12.4 |

<sup>1</sup> Relative contribution of a genus or OTU was calculated as percentage of the total reads belonging to this genus or OTU.

**Supplementary Table S3** List of taxa with significant differences between two studied cohorts or different intraoral habitats.

| Taxa                             | Relative abundance (%) (median, range) |                 |                 |                 |                 | P values assessed by Mann-Whitney U test |                 |                 |                 |                 |                 |
|----------------------------------|----------------------------------------|-----------------|-----------------|-----------------|-----------------|------------------------------------------|-----------------|-----------------|-----------------|-----------------|-----------------|
|                                  | H-Sal                                  | P-Sal           | H-Sup           | P-Sup           | P-Sub           | H-Sal vs. P-Sal                          | H-Sup vs. P-Sup | H-Sal vs. H-Sup | P-Sal vs. P-Sup | P-Sup vs. P-Sub | P-Sal vs. P-Sub |
| <i>Phylum level</i>              |                                        |                 |                 |                 |                 |                                          |                 |                 |                 |                 |                 |
| <i>Bacteroidetes</i>             | 26.4, 6.45-52.1                        | 31.5, 10.6-57.2 | 39.2, 15.4-51.4 | 44.2, 22.1-57.2 | 52.7, 35.4-64.4 | 0.110                                    | 0.011           | 5.10E-05        | 2.35E-05        | 6.98E-05        | 5.71E-09        |
| <i>Firmicutes</i>                | 33.6, 15.0-47.9                        | 33.3, 21.9-52.2 | 13.7, 6.02-23.5 | 18.3, 9.64-25.2 | 16.6, 11.2-23.0 | 0.433                                    | 0.014           | 2.74E-10        | 4.29E-11        | 0.506           | 3.88E-11        |
| <i>Proteobacteria</i>            | 19.0, 1.63-49.0                        | 10.7, 0.51-31.9 | 18.0, 4.02-35.5 | 10.4, 3.83-20.7 | 4.15, 1.37-14.7 | 0.002                                    | 1.29E-04        | 0.408           | 0.544           | 8.51E-07        | 1.44E-06        |
| <i>Fusobacteria</i>              | 5.42, 2.51-15.4                        | 6.36, 2.59-12.9 | 14.6, 5.64-23.3 | 16.5, 10.3-24.7 | 12.6, 3.13-20.8 | 0.128                                    | 0.329           | 9.67E-09        | 1.86E-10        | 0.007           | 3.13E-07        |
| <i>Actinobacteria</i>            | 9.65, 1.63-26.7                        | 7.33, 2.27-23.1 | 8.87, 2.08-32.4 | 6.74, 1.16-19.3 | 3.94, 1.23-17.9 | 0.460                                    | 0.043           | 0.544           | 0.268           | 0.043           | 1.54E-04        |
| <i>Spirochaetes</i>              | 0.38, 0-4.80                           | 1.57, 0.12-5.51 | 0.65, 0-3.49    | 1.38, 0.15-4.61 | 4.61, 1.24-10.8 | 1.21E-05                                 | 0.007           | 0.082           | 0.636           | 2.13E-09        | 2.71E-08        |
| <i>TM7</i>                       | 0.71, 0.21-2.66                        | 1.06, 0.22-2.97 | 1.05, 0.19-4.48 | 1.73, 0.14-5.73 | 1.44, 0.24-3.34 | 0.183                                    | 0.035           | 0.139           | 0.012           | 0.198           | 0.132           |
| <i>SR1</i>                       | 0.11, 0-1.40                           | 0.18, 0-1.69    | 0.07, 0-0.75    | 0.06, 0-0.48    | 0.04, 0-0.35    | 0.253                                    | 0.810           | 0.425           | 0.010           | 0.103           | 2.32E-05        |
| <i>Synergistetes</i>             | 0, 0-0.18                              | 0, 0-0.38       | 0, 0-0.38       | 0.02, 0-0.85    | 0.19, 0-1.18    | 0.398                                    | 0.292           | 0.519           | 0.437           | 1.42E-04        | 1.77E-05        |
| <i>Tenericutes</i>               | 0, 0-0.33                              | 0.09, 0-1.26    | 0, 0-0.14       | 0, 0-0.09       | 0.11, 0-0.68    | 4.40E-04                                 | 0.865           | 0.273           | 1.41E-07        | 1.22E-05        | 0.760           |
| <i>Cyanobacteria/Chloroplast</i> | 0, 0-0.13                              | 0, 0-0.53       | 0, 0-0.02       | 0, 0-0          | 0, 0-0          | 0.727                                    | 0.317           | 0.039           | 0.005           | 1.000           | 0.005           |
| <i>Chloroflexi</i>               | 0, 0-0                                 | 0, 0-0.05       | 0, 0-0          | 0, 0-0.07       | 0, 0-0.15       | 0.040                                    | 0.040           | 1.000           | 0.861           | 0.050           | 0.027           |
| <i>Genus level</i>               |                                        |                 |                 |                 |                 |                                          |                 |                 |                 |                 |                 |
| <i>Prevotella</i>                | 10.0, 2.15-34.7                        | 13.8, 3.17-37.8 | 9.77, 1.11-24.0 | 16.8, 3.54-36.8 | 14.2, 3.37-28.3 | 0.344                                    | 1.21E-04        | 0.337           | 0.183           | 0.046           | 0.802           |
| <i>Porphyromonas</i>             | 5.73, 0.94-30.9                        | 9.32, 1.09-21.3 | 5.57, 0.80-16.4 | 6.67, 2.01-17.7 | 26.3, 1.70-53.5 | 0.035                                    | 0.460           | 0.848           | 0.086           | 5.31E-08        | 7.32E-07        |
| <i>Streptococcus</i>             | 17.4, 6.49-31.3                        | 14.4, 3.61-29.7 | 4.18, 1.88-14.2 | 3.88, 1.30-8.91 | 1.33, 0.27-4.16 | 0.110                                    | 0.193           | 3.64E-10        | 3.31E-10        | 5.82E-07        | 4.29E-11        |
| <i>Neisseria</i>                 | 12.3, 0.76-37.9                        | 6.82, 0.04-22.6 | 7.52, 0.72-20.2 | 3.68, 0.11-11.7 | 1.15, 0-3.78    | 0.006                                    | 0.015           | 0.001           | 0.026           | 1.14E-04        | 1.11E-07        |
| <i>Capnocytophaga</i>            | 2.72, 0.37-8.51                        | 1.50, 0.40-7.87 | 14.8, 7.32-27.6 | 9.05, 6.47-27.6 | 3.52, 1.37-15.6 | 0.055                                    | 9.77E-04        | 3.88E-11        | 6.37E-11        | 1.06E-08        | 5.66E-06        |
| <i>Leptotrichia</i>              | 2.67, 0.83-11.5                        | 2.56, 0.86-8.25 | 10.4, 1.40-19.6 | 10.6, 6.66-17.7 | 4.95, 0.74-16.7 | 0.595                                    | 0.988           | 2.10E-08        | 1.39E-10        | 6.97E-06        | 1.21E-04        |
| <i>Fusobacterium</i>             | 2.57, 0.67-5.88                        | 3.21, 1.05-6.25 | 3.44, 1.06-7.90 | 4.79, 1.56-7.95 | 6.25, 0.73-12.2 | 0.139                                    | 0.024           | 0.011           | 0.004           | 0.007           | 4.91E-06        |
| <i>Actinomyces</i>               | 3.42, 0.59-9.89                        | 3.39, 1.15-12.1 | 3.32, 0.69-16.3 | 2.32, 0.27-13.5 | 2.32, 0.27-13.5 | 0.918                                    | 0.079           | 0.712           | 0.098           | 0.193           | 0.001           |
| <i>Selenomonas</i>               | 0.42, 0-5.44                           | 0.80, 0.06-6.35 | 2.37, 0.09-8.05 | 4.48, 0.69-14.5 | 3.58, 0.94-10.8 | 0.056                                    | 0.003           | 5.27E-06        | 4.49E-08        | 0.069           | 5.82E-07        |
| <i>Veillonella</i>               | 3.86, 0.78-15.0                        | 3.62, 0.63-11.5 | 1.88, 0-7.22    | 2.08, 0.14-4.51 | 0.61, 0.09-2.49 | 0.425                                    | 1.000           | 7.90E-05        | 0.001           | 2.86E-05        | 1.94E-09        |

|                                                |                 |                 |                 |                 |                 |          |          |          |          |          |          |
|------------------------------------------------|-----------------|-----------------|-----------------|-----------------|-----------------|----------|----------|----------|----------|----------|----------|
| <i>Treponema</i>                               | 0.32, 0-4.80    | 1.55, 0.12-5.51 | 0.65, 0-3.49    | 1.38, 0.15-4.61 | 4.57, 1.24-10.8 | 1.29E-05 | 0.007    | 0.059    | 0.668    | 2.33E-09 | 2.49E-08 |
| <i>Rothia</i>                                  | 4.41, 0.75-15.4 | 2.90, 0.55-10.8 | 0.69, 0-9.83    | 0.15, 0-1.87    | 0.07, 0-1.17    | 0.101    | 1.20E-04 | 1.53E-07 | 5.73E-10 | 0.051    | 5.22E-11 |
| <i>Corynebacterium</i>                         | 0.20, 0-3.32    | 0.32, 0-1.83    | 3.47, 0.80-15.6 | 1.84, 0.42-7.49 | 0.60, 0.18-3.61 | 0.717    | 0.016    | 1.76E-09 | 5.18E-07 | 0.001    | 0.003    |
| <i>Granulicatella</i>                          | 2.66, 0.87-6.73 | 3.09, 0.18-11.9 | 0.31, 0-1.03    | 0.10, 0-1.39    | 0.05, 0-0.48    | 0.121    | 0.018    | 3.83E-11 | 7.67E-11 | 0.015    | 3.24E-11 |
| <i>TM7_genera_incertainae_sedis</i>            | 0.71, 0.21-2.66 | 1.06, 0.22-2.97 | 1.05, 0.19-4.48 | 1.73, 0.14-5.73 | 1.44, 0.24-3.34 | 0.183    | 0.035    | 0.139    | 0.012    | 0.198    | 0.132    |
| <i>Haemophilus</i>                             | 2.96, 0.38-7.43 | 1.61, 0-6.09    | 0.42, 0-3.99    | 0.11, 0-2.01    | 0.02, 0-0.44    | 0.002    | 0.011    | 4.13E-08 | 1.05E-06 | 0.006    | 1.56E-09 |
| <i>Clostridium XIVa</i>                        | 0.96, 0.41-4.54 | 1.16, 0.08-6.41 | 0.65, 0.09-3.59 | 0.97, 0.28-2.60 | 0.50, 0.05-2.70 | 1.000    | 0.030    | 0.016    | 0.745    | 0.012    | 0.011    |
| <i>Gemella</i>                                 | 1.55, 0.06-6.30 | 1.87, 0.09-5.29 | 0.32, 0-1.38    | 0.28, 0-1.45    | 0.15, 0-0.63    | 0.544    | 0.496    | 7.98E-08 | 1.66E-07 | 0.066    | 3.62E-09 |
| <i>Tannerella</i>                              | 0.06, 0-0.87    | 0.41, 0-2.44    | 0.07, 0-1.61    | 0.28, 0-1.78    | 2.57, 0.05-10.1 | 6.94E-04 | 0.003    | 0.915    | 0.399    | 2.79E-09 | 2.10E-08 |
| <i>Filifactor</i>                              | 0.07, 0-1.90    | 0.78, 0-2.43    | 0.06, 0-0.56    | 0.20, 0-1.13    | 2.00, 0.10-5.02 | 1.34E-04 | 0.003    | 0.677    | 0.002    | 9.66E-09 | 1.38E-05 |
| <i>Peptostreptococcus</i>                      | 0.43, 0-2.33    | 0.93, 0.18-4.38 | 0.08, 0-1.18    | 0.26, 0-1.69    | 0.30, 0-2.07    | 7.10E-04 | 0.004    | 7.55E-06 | 1.47E-05 | 0.243    | 9.50E-05 |
| <i>Campylobacter</i>                           | 0.34, 0-2.47    | 0.27, 0.10-0.71 | 0.75, 0.14-3.45 | 0.86, 0.21-2.11 | 0.56, 0.08-1.60 | 0.712    | 0.425    | 1.14E-04 | 2.29E-08 | 0.006    | 5.10E-05 |
| <i>Aggregatibacter</i>                         | 0.21, 0-1.28    | 0.38, 0-1.18    | 0.80, 0-3.55    | 0.56, 0-2.88    | 0.10, 0-0.89    | 0.120    | 0.176    | 7.03E-04 | 0.137    | 2.73E-04 | 3.63E-04 |
| <i>Soonwooia</i>                               | 0.37, 0-2.18    | 0.22, 0-2.16    | 0.34, 0-6.49    | 0.22, 0-2.25    | 0.05, 0-0.77    | 0.080    | 0.089    | 0.684    | 0.723    | 0.003    | 1.42E-04 |
| <i>Kingella</i>                                | 0.11, 0-0.71    | 0.06, 0-1.21    | 0.67, 0.05-1.88 | 0.31, 0.06-3.31 | 0.15, 0-4.25    | 0.447    | 0.002    | 2.25E-08 | 1.11E-04 | 0.003    | 0.237    |
| <i>Cardiobacterium</i>                         | 0.06, 0-0.55    | 0.05, 0-0.19    | 0.77, 0.07-3.83 | 0.35, 0-2.08    | 0.20, 0-1.41    | 0.467    | 5.12E-04 | 2.01E-09 | 3.04E-07 | 0.018    | 4.19E-05 |
| <i>Dialister</i>                               | 0.09, 0-0.99    | 0.20, 0-1.64    | 0.24, 0-1.09    | 0.27, 0-1.59    | 0.48, 0.05-2.18 | 0.063    | 0.773    | 0.005    | 0.294    | 0.003    | 1.45E-04 |
| <i>Eubacterium</i>                             | 0.12, 0-0.93    | 0.54, 0-1.58    | 0.04, 0-0.38    | 0.11, 0-0.52    | 0.61, 0.15-1.26 | 7.99E-05 | 0.098    | 0.023    | 1.10E-06 | 9.30E-09 | 0.249    |
| <i>Schwartzia</i>                              | 0, 0-0.29       | 0.05, 0-0.40    | 0.09, 0-0.48    | 0.30, 0-1.33    | 0.38, 0-2.17    | 0.007    | 1.24E-03 | 3.06E-04 | 1.91E-05 | 0.287    | 1.10E-07 |
| <i>Parvimonas</i>                              | 0.06, 0-0.46    | 0.25, 0-2.09    | 0.05, 0-0.31    | 0.05, 0-0.47    | 0.11, 0-1.48    | 5.50E-04 | 0.377    | 0.080    | 8.89E-05 | 0.028    | 0.031    |
| <i>SR1_genera_incertainae_sedis</i>            | 0.11, 0-1.40    | 0.18, 0-1.69    | 0.07, 0-0.75    | 0.06, 0-0.48    | 0.04, 0-0.35    | 0.253    | 0.810    | 0.425    | 0.010    | 0.103    | 2.32E-05 |
| <i>Hallella</i>                                | 0.02, 0-0.31    | 0.09, 0-0.71    | 0.05, 0-0.73    | 0.11, 0-3.13    | 0.15, 0-1.34    | 0.020    | 0.052    | 0.177    | 0.064    | 0.941    | 0.065    |
| <i>Peptostreptococcaceae_incertainae_sedis</i> | 0.05, 0-0.20    | 0.09, 0-0.31    | 0.05, 0-0.91    | 0.11, 0-0.92    | 0.14, 0-0.83    | 0.468    | 0.206    | 0.553    | 0.140    | 0.253    | 0.006    |
| <i>Olsenella</i>                               | 0, 0-0.38       | 0.09, 0-0.49    | 0.04, 0-0.42    | 0.06, 0-0.64    | 0.20, 0-1.45    | 0.018    | 0.117    | 0.454    | 0.922    | 0.001    | 0.001    |
| <i>Solobacterium</i>                           | 0.12, 0-1.13    | 0.19, 0.04-1.66 | 0, 0-0.22       | 0, 0-0.25       | 0, 0-0.21       | 0.139    | 0.652    | 7.20E-05 | 4.88E-08 | 0.987    | 8.77E-08 |
| <i>Limnohabitans</i>                           | 0, 0-0.11       | 0, 0-0.41       | 0.05, 0-0.96    | 0.05, 0-2.53    | 0, 0-1.15       | 0.041    | 0.579    | 6.71E-04 | 0.037    | 0.083    | 0.817    |
| <i>Eikenella</i>                               | 0, 0-0.35       | 0, 0-0.42       | 0.14, 0-1.51    | 0.11, 0-0.60    | 0.06, 0-0.34    | 0.603    | 0.198    | 1.18E-06 | 1.14E-05 | 0.126    | 5.87E-04 |
| <i>Atopobium</i>                               | 0.07, 0-1.02    | 0.11, 0-1.40    | 0, 0-0.07       | 0, 0-0.21       | 0, 0-0.15       | 0.284    | 0.370    | 4.99E-04 | 7.13E-05 | 0.664    | 1.23E-05 |
| <i>Peptococcus</i>                             | 0, 0-0.27       | 0.12, 0-0.46    | 0, 0-0.13       | 0.02, 0-0.34    | 0.11, 0-0.48    | 3.84E-04 | 0.285    | 0.567    | 0.003    | 0.010    | 0.738    |

|                                      |              |              |           |              |              |          |          |          |          |          |          |
|--------------------------------------|--------------|--------------|-----------|--------------|--------------|----------|----------|----------|----------|----------|----------|
| <i>Megasphaera</i>                   | 0.05, 0-1.67 | 0.05, 0-1.72 | 0, 0-0.10 | 0, 0-0.35    | 0, 0-0.41    | 0.811    | 0.004    | 2.55E-05 | 0.072    | 0.117    | 0.002    |
| <i>Mycoplasma</i>                    | 0, 0-0.26    | 0.09, 0-1.26 | 0, 0-0.14 | 0, 0-0.09    | 0.11, 0-0.68 | 2.04E-04 | 0.637    | 0.306    | 7.96E-08 | 6.26E-06 | 0.715    |
| <i>Phocaeicola</i>                   | 0, 0-0.27    | 0, 0-0.12    | 0, 0-0.21 | 0.05, 0-1.38 | 0.13, 0-1.52 | 0.243    | 0.011    | 0.460    | 0.020    | 0.129    | 5.18E-04 |
| <i>Bacteroides</i>                   | 0, 0-0.37    | 0, 0-0.65    | 0, 0-0.11 | 0, 0-0.25    | 0.06, 0-0.55 | 0.142    | 0.012    | 0.661    | 0.796    | 0.007    | 0.007    |
| <i>Anaeroglobus</i>                  | 0, 0-0.60    | 0, 0-0.35    | 0, 0-0.36 | 0.04, 0-0.37 | 0.10, 0-0.44 | 0.085    | 0.002    | 0.864    | 0.167    | 0.134    | 0.016    |
| <i>Desulfobulbus</i>                 | 0, 0-0.25    | 0, 0-0.20    | 0, 0-0.07 | 0, 0-0.16    | 0.10, 0-0.63 | 0.047    | 0.064    | 0.596    | 0.475    | 0.003    | 0.013    |
| <i>Johnsonella</i>                   | 0, 0-0.13    | 0, 0-0.12    | 0, 0-0.75 | 0, 0-0.30    | 0.02, 0-1.46 | 0.460    | 1.000    | 0.008    | 0.059    | 0.277    | 0.003    |
| <i>Shuttleworthia</i>                | 0, 0-0.32    | 0.07, 0-0.52 | 0, 0-0.09 | 0, 0-0.42    | 0, 0-0.34    | 1.11E-04 | 0.324    | 0.283    | 1.11E-04 | 0.886    | 2.07E-04 |
| <i>Dysgonomonas</i>                  | 0, 0-0.07    | 0, 0-0.10    | 0, 0-0.08 | 0, 0-1.45    | 0, 0-0.69    | 0.622    | 0.010    | 0.379    | 0.006    | 0.648    | 0.013    |
| <i>Lachnospiracea_incertae_sedis</i> | 0, 0-0.19    | 0, 0-0.27    | 0, 0-0    | 0, 0-0.23    | 0.05, 0-0.59 | 0.009    | 6.35E-04 | 0.021    | 0.210    | 0.035    | 0.351    |
| <i>Butyrivibrio</i>                  | 0, 0-0.61    | 0, 0-0.50    | 0, 0-0    | 0, 0-0.27    | 0, 0-0.36    | 0.797    | 0.154    | 1.39E-04 | 0.011    | 1.000    | 0.010    |
| <i>Moryella</i>                      | 0, 0-0.20    | 0, 0-0.20    | 0, 0-0.13 | 0, 0-0.11    | 0.05, 0-0.18 | 0.007    | 0.185    | 0.175    | 0.004    | 6.21E-05 | 0.278    |
| <i>Mogibacterium</i>                 | 0, 0-0.31    | 0.05, 0-0.28 | 0, 0-0    | 0, 0-0.10    | 0, 0-0.12    | 7.82E-04 | 0.040    | 0.001    | 4.20E-06 | 0.157    | 2.12E-04 |
| <i>Streptobacillus</i>               | 0, 0-0.05    | 0, 0-0.52    | 0, 0-0.07 | 0, 0-0.06    | 0, 0-0       | 0.006    | 0.185    | 0.330    | 0.010    | 0.040    | 1.39E-04 |

- Enriched in periodontitis patients
- Enriched in healthy populations
- Enriched in saliva
- Enriched in supragingival plaque
- Enriched in subgingival plaque

35 **Supplementary Table S4** Phylogeny of the 110 key OTUs identified by two-step RDA, which showed significant differences between periodontitis patients and healthy controls.

| OTU name | Domain   | Phylum         | Class          | Order            | Family                | Genus                                        | Nearest neighbors (based HOMD)                                                                             |
|----------|----------|----------------|----------------|------------------|-----------------------|----------------------------------------------|------------------------------------------------------------------------------------------------------------|
| OTU0089  | Bacteria | Actinobacteria | Actinobacteria | Actinomycetales  | Actinomycetaceae      | Actinomyces                                  | <i>Actinomyces cardiffensis</i> ; HOT_850; GU470888 (99.4%)                                                |
| OTU0054  | Bacteria | Bacteroidetes  | Bacteroidia    | Bacteroidales    | Porphyromonadaceae    | Porphyromonas                                | <i>Porphyromonas gingivalis</i> ; HOT_619; X73964 (100%)                                                   |
| OTU0096  | Bacteria | Bacteroidetes  | Bacteroidia    | Bacteroidales    | Porphyromonadaceae    | Porphyromonas                                | <i>Porphyromonas endodontalis</i> ; HOT_273; L16491 (100%)                                                 |
| OTU0204  | Bacteria | Bacteroidetes  | Bacteroidia    | Bacteroidales    | Porphyromonadaceae    | Tannerella                                   | <i>Tannerella forsythia</i> ; HOT_613; L16495 (100%)                                                       |
| OTU0200  | Bacteria | Bacteroidetes  | Bacteroidia    | Bacteroidales    | Prevotellaceae        | Prevotella                                   | <i>Prevotella</i> sp.; HOT_304; AY005065 (100%)                                                            |
| OTU0290  | Bacteria | Bacteroidetes  | Bacteroidia    | Bacteroidales    | Prevotellaceae        | Prevotella                                   | <i>Prevotella</i> sp.; HOT_526; DQ003633 (100%)                                                            |
| OTU0211  | Bacteria | Bacteroidetes  | Bacteroidia    | Bacteroidales    | Prevotellaceae        | Prevotella                                   | <i>Prevotella</i> sp.; HOT_443; AY331415 (99.4%)                                                           |
| OTU0456  | Bacteria | Bacteroidetes  | Bacteroidia    | Bacteroidales    | Prevotellaceae        | Prevotella                                   | <i>Prevotella loescheii</i> ; HOT_658; L16481 (96.2%)                                                      |
| OTU0304  | Bacteria | Bacteroidetes  |                |                  |                       |                                              | <i>Bacteroidetes</i> [G-3] sp.; HOT_280; AY005071 (100%)                                                   |
| OTU0177  | Bacteria | Firmicutes     | Clostridia     | Clostridiales    | Eubacteriaceae        | Eubacterium                                  | <i>Eubacterium</i> [XI][G-6] <i>nodatum</i> ; HOT_694; Z36274 (100%)                                       |
| OTU0198  | Bacteria | Firmicutes     | Clostridia     | Clostridiales    | Lachnospiraceae       | <i>Lachnospiraceae</i> <i>incertae sedis</i> | <i>Moryella</i> sp.; HOT_419; AY278618 (93.4%)                                                             |
| OTU0308  | Bacteria | Firmicutes     | Clostridia     | Clostridiales    | Lachnospiraceae       |                                              | <i>Lachnospiraceae</i> [G-8] sp.; HOT_500; AY349389 (99.3%)                                                |
| OTU0263  | Bacteria | Firmicutes     | Clostridia     | Clostridiales    | Peptostreptococcaceae | Filifactor                                   | <i>Filifactor alocis</i> ; HOT_539; AJ006962 (100%)                                                        |
| OTU0115  | Bacteria | Firmicutes     | Clostridia     | Clostridiales    | Peptostreptococcaceae | Peptostreptococcus                           | <i>Peptostreptococcus stomatis</i> ; HOT_112; GQ422715 (100%)                                              |
| OTU0287  | Bacteria | Firmicutes     | Clostridia     | Clostridiales    |                       |                                              | <i>Johnsonella</i> sp.; HOT_166; AF287774 (99.3%)                                                          |
| OTU0413  | Bacteria | Firmicutes     | Clostridia     | Clostridiales    |                       |                                              | <i>Peptostreptococcaceae</i> [XI][G-4] sp.; HOT_369; AF481212 (100%)                                       |
| OTU0312  | Bacteria | Firmicutes     | Clostridia     | Clostridiales    |                       |                                              | <i>Peptostreptococcaceae</i> [XI][G-3] sp.; HOT_382; HE681251 (100%)                                       |
| OTU0463  | Bacteria | Firmicutes     | Clostridia     | Clostridiales    |                       |                                              | <i>Peptostreptococcaceae</i> [XI][G-3] sp.; HOT_382; HE681251 (89.3%)                                      |
| OTU0309  | Bacteria | Firmicutes     |                |                  |                       |                                              | <i>Mollicutes</i> [G-2] sp.; HOT_906; KC203059 (100%)                                                      |
| OTU0146  | Bacteria | Fusobacteria   | Fusobacteria   | Fusobacteriales  | Leptotrichiaceae      |                                              | <i>Leptotrichiaceae</i> [G-1] sp.; HOT_220; AF385542 (100%)                                                |
| OTU0223  | Bacteria |                |                |                  |                       |                                              | <i>Fretibacterium</i> sp.; HOT_452; AY349370 (100%)<br><i>Fretibacterium</i> sp.; HOT_359; AY005447 (100%) |
| OTU0126  | Bacteria | Actinobacteria | Actinobacteria | Coriobacteriales | Coriobacteriaceae     | Olsenella                                    | <i>Olsenella uli</i> ; HOT_038; AF292373 (100%)                                                            |
| OTU0655  | Bacteria | Bacteroidetes  | Bacteroidia    | Bacteroidales    | Porphyromonadaceae    | Porphyromonas                                | <i>Porphyromonas</i> sp.; HOT_278; AF385560 (98.1%)<br><i>Porphyromonas</i> sp.; HOT_277; AF385555 (98.1%) |
| OTU0294  | Bacteria | Bacteroidetes  | Bacteroidia    | Bacteroidales    | Prevotellaceae        | Prevotella                                   | <i>Prevotella</i> sp.; HOT_526; DQ003633 (99.4%)                                                           |
| OTU0288  | Bacteria | Bacteroidetes  | Bacteroidia    | Bacteroidales    | Prevotellaceae        | Prevotella                                   | <i>Prevotella shahii</i> ; HOT_795; AB108825 (98.7%)                                                       |

|         |          |               |                  |                    |                                   |                  |                                                                                                                                                                                  |
|---------|----------|---------------|------------------|--------------------|-----------------------------------|------------------|----------------------------------------------------------------------------------------------------------------------------------------------------------------------------------|
| OTU0196 | Bacteria | Bacteroidetes | Bacteroidia      | Bacteroidales      | Prevotellaceae                    | Prevotella       | <i>Prevotella nigrescens</i> ; HOT_693; X73963 (98.7%)                                                                                                                           |
| OTU0209 | Bacteria | Bacteroidetes | Bacteroidia      | Bacteroidales      | Prevotellaceae                    | Prevotella       | <i>Alloprevotella tanneriae</i> ; HOT_466; AJ005634 (98.7%)                                                                                                                      |
| OTU0462 | Bacteria | Bacteroidetes | Bacteroidia      | Bacteroidales      | Prevotellaceae                    | Prevotella       | <i>Prevotella loescheii</i> ; HOT_658; L16481 (94.9%)                                                                                                                            |
| OTU0338 | Bacteria | Bacteroidetes |                  |                    |                                   |                  | <i>Bacteroidetes</i> [G-3] sp.; HOT_503; DQ003613 (100%)                                                                                                                         |
| OTU0113 | Bacteria | Firmicutes    | Bacilli          | Lactobacillales    | Streptococcaceae                  | Streptococcus    | <i>Streptococcus constellatus</i> ; HOT_576; AF104676 (100%)                                                                                                                     |
| OTU0085 | Bacteria | Firmicutes    | Clostridia       | Clostridiales      | Clostridiales_Incertae Sedis XI   | Parvimonas       | <i>Parvimonas micra</i> ; HOT_111; AY323523 (100%)                                                                                                                               |
| OTU0222 | Bacteria | Firmicutes    | Clostridia       | Clostridiales      | Clostridiales_Incertae Sedis XI   | Sporanaerobacter | <i>Peptostreptococcaceae</i> [XIII][G-2] sp.; HOT_790; AY134899 (100%)                                                                                                           |
| OTU0217 | Bacteria | Firmicutes    | Clostridia       | Clostridiales      | Clostridiales_Incertae Sedis XI   |                  | <i>Peptostreptococcaceae</i> [XIII][G-1] sp.; HOT_113; AF287766 (100%)                                                                                                           |
| OTU0103 | Bacteria | Firmicutes    | Clostridia       | Clostridiales      | Clostridiales_Incertae Sedis XIII | Mogibacterium    | <i>Mogibacterium neglectum</i> ; HOT_691; AB037875 (100%)<br><i>Mogibacterium diversum</i> ; HOT_593; AB037874 (100%)<br><i>Mogibacterium vesicum</i> ; HOT_008; AB021702 (100%) |
| OTU0099 | Bacteria | Firmicutes    | Clostridia       | Clostridiales      | Eubacteriaceae                    | Eubacterium      | <i>Eubacterium</i> [XI][G-3] <i>brachy</i> ; HOT_557; U13038 (100%)                                                                                                              |
| OTU0273 | Bacteria | Firmicutes    | Clostridia       | Clostridiales      | Eubacteriaceae                    | Eubacterium      | <i>Eubacterium</i> [XI][G-5] <i>saphenum</i> ; HOT_759; U65987 (99.3%)                                                                                                           |
| OTU0056 | Bacteria | Firmicutes    | Clostridia       | Clostridiales      | Incertae Sedis XI                 | Murdochiella     | <i>Parvimonas micra</i> ; HOT_111; AY323523 (89.9%)                                                                                                                              |
| OTU0272 | Bacteria | Firmicutes    | Clostridia       | Clostridiales      | Lachnospiraceae                   | Catonella        | <i>Catonella morbi</i> ; HOT_165; DQ003629 (97.1%)                                                                                                                               |
| OTU0134 | Bacteria | Firmicutes    | Clostridia       | Clostridiales      | Lachnospiraceae                   | Shuttleworthia   | <i>Shuttleworthia satelles</i> ; HOT_095; AF399956 (100%)                                                                                                                        |
| OTU0356 | Bacteria | Firmicutes    | Clostridia       | Clostridiales      | Peptococcaceae 1                  | Peptococcus      | <i>Peptococcus</i> sp.; HOT_168; AF287780 (98.1%)                                                                                                                                |
| OTU0353 | Bacteria | Firmicutes    | Erysipelotrichia | Erysipelotrichales | Erysipelotrichaceae               | Solobacterium    | <i>Solobacterium moorei</i> ; HOT_678; AY044915 (97.5%)                                                                                                                          |
| OTU0255 | Bacteria | Firmicutes    | Negativicutes    | Selenomonadales    | Veillonellaceae                   | Schwartzia       | <i>Veillonellaceae</i> [G-1] sp.; HOT_483; AY349410 (100%)                                                                                                                       |
| OTU0432 | Bacteria | Fusobacteria  | Fusobacteria     | Fusobacteriales    | Leptotrichiaceae                  | Leptotrichia     | <i>Leptotrichia goodfellowii</i> ; HOT_845; AY029807 (100%)                                                                                                                      |
| OTU0630 | Bacteria | Spirochaetes  | Spirochaetes     | Spirochaetales     | Spirochaetaceae                   | Treponema        | <i>Treponema socranskii ss socranskii</i> ; HOT_769; AF033306 (89.5%)                                                                                                            |
| OTU0354 | Bacteria | Spirochaetes  | Spirochaetes     | Spirochaetales     | Spirochaetaceae                   | Treponema        | <i>Treponema</i> sp.; HOT_270; GQ422733 (100%)                                                                                                                                   |
| OTU0259 | Bacteria | Spirochaetes  | Spirochaetes     | Spirochaetales     | Spirochaetaceae                   | Treponema        | <i>Treponema</i> sp.; HOT_517; DQ003624 (100%)<br><i>Treponema</i> sp.; HOT_256; AF182835 (100%)<br><i>Treponema</i> sp.; HOT_253; AF182838 (100%)                               |
| OTU0265 | Bacteria | Spirochaetes  | Spirochaetes     | Spirochaetales     | Spirochaetaceae                   | Treponema        | <i>Treponema</i> sp.; HOT_237; AF056337 (100%)                                                                                                                                   |
| OTU0274 | Bacteria | Spirochaetes  | Spirochaetes     | Spirochaetales     | Spirochaetaceae                   | Treponema        | <i>Treponema denticola</i> ; HOT_584; M71236 (100%)                                                                                                                              |
| OTU0276 | Bacteria | Spirochaetes  | Spirochaetes     | Spirochaetales     | Spirochaetaceae                   | Treponema        | <i>Treponema</i> sp.; HOT_237; AY341822 (99.4%)<br><i>Treponema</i> sp.; HOT_234; AF023056 (99.4%)                                                                               |
| OTU0298 | Bacteria | Spirochaetes  | Spirochaetes     | Spirochaetales     | Spirochaetaceae                   | Treponema        | <i>Treponema socranskii ss socranskii</i> ; HOT_769; AF033306 (89.4%)                                                                                                            |
| OTU0307 | Bacteria | Spirochaetes  | Spirochaetes     | Spirochaetales     | Spirochaetaceae                   | Treponema        | <i>Treponema denticola</i> ; HOT_584; AF023030 (99.4%)                                                                                                                           |
| OTU0366 | Bacteria | Spirochaetes  | Spirochaetes     | Spirochaetales     | Spirochaetaceae                   | Treponema        | <i>Treponema</i> sp.; HOT_234; AF023056 (100%)                                                                                                                                   |

|         |          |                       |                              |                          |                           |                         |                                                                                                                  |
|---------|----------|-----------------------|------------------------------|--------------------------|---------------------------|-------------------------|------------------------------------------------------------------------------------------------------------------|
| OTU0475 | Bacteria | <i>Spirochaetes</i>   | <i>Spirochaetes</i>          | <i>Spirochaetales</i>    | <i>Spirochaetaceae</i>    | <i>Treponema</i>        | <i>Treponema</i> sp.; HOT_237; AY341822 (98.8%)<br><i>Treponema</i> sp.; HOT_234; AF023056 (98.8%)               |
| OTU0489 | Bacteria | <i>Spirochaetes</i>   | <i>Spirochaetes</i>          | <i>Spirochaetales</i>    | <i>Spirochaetaceae</i>    | <i>Treponema</i>        | <i>Treponema</i> sp.; HOT_254; AF182836 (96.9%)                                                                  |
| OTU0160 | Bacteria | <i>Tenericutes</i>    | <i>Mollicutes</i>            | <i>Mycoplasmatales</i>   | <i>Mycoplasmataceae</i>   | <i>Mycoplasma</i>       | <i>Mycoplasma faucium</i> ; HOT_606; AF125590 (100%)                                                             |
| OTU0236 | Bacteria |                       |                              |                          |                           |                         | <i>Fretibacterium</i> sp.; HOT_452; AY349370 (99.3%)<br><i>Fretibacterium</i> sp.; HOT_359; AY005447 (99.3%)     |
| OTU0174 | Bacteria | <i>Bacteroidetes</i>  | <i>Bacteroidia</i>           | <i>Bacteroidales</i>     | <i>Prevotellaceae</i>     | <i>Prevotella</i>       | <i>Prevotella</i> sp.; HOT_299; AY005064 (99.4%)                                                                 |
| OTU0048 | Bacteria | <i>Firmicutes</i>     | <i>Clostridia</i>            | <i>Clostridiales</i>     | <i>Lachnospiraceae</i>    | <i>Clostridium XIVa</i> | <i>Oribacterium</i> sp.; HOT_108; AF287770 (100%)                                                                |
| OTU0186 | Bacteria | <i>Proteobacteria</i> | <i>Betaproteobacteria</i>    | <i>Neisseriales</i>      | <i>Neisseriaceae</i>      | <i>Neisseria</i>        | <i>Neisseria pharyngis</i> ; HOT_729; AJ239281 (99.4%)                                                           |
| OTU0392 | Bacteria | <i>Proteobacteria</i> | <i>Betaproteobacteria</i>    | <i>Neisseriales</i>      | <i>Neisseriaceae</i>      | <i>Neisseria</i>        | <i>Neisseria subflava</i> ; HOT_476; AJ239291 (98.8%)                                                            |
| OTU0153 | Bacteria | <i>Proteobacteria</i> | <i>Epsilonproteobacteria</i> | <i>Campylobacterales</i> | <i>Campylobacteraceae</i> | <i>Campylobacter</i>    | <i>Campylobacter concisus</i> ; HOT_575; L06977 (99.3%)                                                          |
| OTU0285 | Bacteria | <i>Actinobacteria</i> | <i>Actinobacteria</i>        | <i>Actinomycetales</i>   | <i>Actinomycetaceae</i>   | <i>Actinomyces</i>      | <i>Actinomyces israelii</i> ; HOT_645; X82450 (98.1%)                                                            |
| OTU0305 | Bacteria | <i>Bacteroidetes</i>  | <i>Bacteroidia</i>           | <i>Bacteroidales</i>     | <i>Bacteroidaceae</i>     | <i>Bacteroides</i>      | <i>Bacteroides heparinolyticus</i> ; HOT_630; GQ422742 (100%)                                                    |
| OTU0581 | Bacteria | <i>Bacteroidetes</i>  | <i>Bacteroidia</i>           | <i>Bacteroidales</i>     | <i>Porphyromonadaceae</i> | <i>Dysgonomonas</i>     | <i>Bacteroidales</i> [G-2] sp.; HOT_274; AY005072 (98.7%)                                                        |
| OTU0415 | Bacteria | <i>Bacteroidetes</i>  | <i>Bacteroidia</i>           | <i>Bacteroidales</i>     | <i>Porphyromonadaceae</i> |                         | <i>Tannerella</i> sp.; HOT_916; KC203065 (99.4%)                                                                 |
| OTU0171 | Bacteria | <i>Bacteroidetes</i>  | <i>Bacteroidia</i>           | <i>Bacteroidales</i>     | <i>Porphyromonadaceae</i> |                         | <i>Tannerella</i> sp.; HOT_916; KC203065 (97.5%)                                                                 |
| OTU0249 | Bacteria | <i>Bacteroidetes</i>  | <i>Bacteroidia</i>           | <i>Bacteroidales</i>     | <i>Prevotellaceae</i>     | <i>Prevotella</i>       | <i>Prevotella shahii</i> ; HOT_795; AB108825 (96.2%)                                                             |
| OTU0556 | Bacteria | <i>Bacteroidetes</i>  | <i>Bacteroidia</i>           | <i>Bacteroidales</i>     | <i>Prevotellaceae</i>     | <i>Prevotella</i>       | <i>Prevotella intermedia</i> ; HOT_643; L16468 (94.9%)                                                           |
| OTU0173 | Bacteria | <i>Bacteroidetes</i>  | <i>Bacteroidia</i>           | <i>Bacteroidales</i>     | <i>Prevotellaceae</i>     | <i>Prevotella</i>       | <i>Prevotella intermedia</i> ; HOT_643; L16468 (98.1%)                                                           |
| OTU0334 | Bacteria | <i>Bacteroidetes</i>  | <i>Bacteroidia</i>           | <i>Bacteroidales</i>     | <i>Prevotellaceae</i>     | <i>Prevotella</i>       | <i>Prevotella</i> sp.; HOT_301; AF385558 (100%)                                                                  |
| OTU0615 | Bacteria | <i>Bacteroidetes</i>  | <i>Bacteroidia</i>           | <i>Bacteroidales</i>     | <i>Prevotellaceae</i>     | <i>Prevotella</i>       | <i>Prevotella shahii</i> ; HOT_795; AB108825 (97.5%)                                                             |
| OTU0108 | Bacteria | <i>Bacteroidetes</i>  | <i>Bacteroidia</i>           | <i>Bacteroidales</i>     | <i>Prevotellaceae</i>     | <i>Prevotella</i>       | <i>Prevotella melaninogenica</i> ; HOT_469; AY323525 (100%)                                                      |
| OTU0179 | Bacteria | <i>Bacteroidetes</i>  | <i>Bacteroidia</i>           | <i>Bacteroidales</i>     | <i>Prevotellaceae</i>     | <i>Prevotella</i>       | <i>Prevotella veroralis</i> ; HOT_572; L16473 (99.4%)<br><i>Prevotella histicola</i> ; HOT_298; AF385551 (99.4%) |
| OTU0193 | Bacteria | <i>Bacteroidetes</i>  | <i>Bacteroidia</i>           | <i>Bacteroidales</i>     | <i>Prevotellaceae</i>     | <i>Prevotella</i>       | <i>Prevotella histicola</i> ; HOT_298; AF385551 (97.5%)                                                          |
| OTU0228 | Bacteria | <i>Bacteroidetes</i>  | <i>Bacteroidia</i>           | <i>Bacteroidales</i>     | <i>Prevotellaceae</i>     | <i>Prevotella</i>       | <i>Prevotella</i> sp.; HOT_443; AY331415 (100%)                                                                  |
| OTU0358 | Bacteria | <i>Bacteroidetes</i>  | <i>Bacteroidia</i>           | <i>Bacteroidales</i>     | <i>Prevotellaceae</i>     | <i>Prevotella</i>       | <i>Prevotella micans</i> ; HOT_378; AF481228 (98.7%)                                                             |
| OTU0341 | Bacteria | <i>Bacteroidetes</i>  | <i>Bacteroidia</i>           | <i>Bacteroidales</i>     | <i>Prevotellaceae</i>     |                         | <i>Prevotella</i> sp.; HOT_396; AY207050 (96.2%)                                                                 |
| OTU0510 | Bacteria | <i>Bacteroidetes</i>  | <i>Bacteroidia</i>           | <i>Bacteroidales</i>     |                           |                         | <i>Tannerella</i> sp.; HOT_286; AY008308 (96.8%)                                                                 |
| OTU0492 | Bacteria | <i>Chloroflexi</i>    | <i>Anaerolineae</i>          | <i>Anaerolineales</i>    | <i>Anaerolineaceae</i>    |                         | <i>Chloroflexi</i> [G-1] sp.; HOT_439; AY331414 (100%)                                                           |
| OTU0032 | Bacteria | <i>Firmicutes</i>     | <i>Bacilli</i>               | <i>Lactobacillales</i>   | <i>Streptococcaceae</i>   | <i>Streptococcus</i>    | <i>Streptococcus parasanguinis II</i> ; HOT_411; EF399017 (100%)                                                 |
| OTU0088 | Bacteria | <i>Firmicutes</i>     | <i>Clostridia</i>            | <i>Clostridiales</i>     | <i>Lachnospiraceae</i>    | <i>Clostridium XIVa</i> | <i>Lachnoanaerobaculum</i> sp.; HOT_083; AF385562 (100%)                                                         |



|         |          |                |                           |                           |                           |                           |                                                                                                                     |
|---------|----------|----------------|---------------------------|---------------------------|---------------------------|---------------------------|---------------------------------------------------------------------------------------------------------------------|
| OTU0350 | Bacteria | Firmicutes     | Clostridia                | Clostridiales             | Lachnospiraceae           |                           | Lachnospiraceae [G-5] sp.; HOT_080; AF287772 (100%)                                                                 |
| OTU0264 | Bacteria | Firmicutes     | Clostridia                | Clostridiales             |                           |                           | Peptostreptococcaceae [XI][G-5] sp.; HOT_493; AY349373 (96.4%)                                                      |
| OTU0074 | Bacteria | Firmicutes     | Negativicutes             | Selenomonadales           | Veillonellaceae           | Centipeda                 | Selenomonas sp.; HOT_149; AY349403 (100%)                                                                           |
| OTU0072 | Bacteria | Firmicutes     | Negativicutes             | Selenomonadales           | Veillonellaceae           | Selenomonas               | Selenomonas infelix; HOT_639; AF287802 (100%)                                                                       |
| OTU0437 | Bacteria | Firmicutes     | Negativicutes             | Selenomonadales           | Veillonellaceae           |                           | Selenomonas sputigena; HOT_151; GQ422722 (96.3%)                                                                    |
| OTU0402 | Bacteria | Firmicutes     |                           |                           |                           |                           | Treponema denticola; HOT_584; AF023030 (83.4%)                                                                      |
| OTU0138 | Bacteria | Fusobacteria   | Fusobacteria              | Fusobacteriales           | Fusobacteriaceae          | Fusobacterium             | Fusobacterium periodonticum; HOT_201; X55405 (99.3%)                                                                |
| OTU0539 | Bacteria | Fusobacteria   | Fusobacteria              | Fusobacteriales           | Fusobacteriaceae          | Fusobacterium             | Fusobacterium naviforme; HOT_689; AJ006965 (94.3%)<br>Fusobacterium nucleatum ss. animalis; HOT_420; X55404 (94.3%) |
| OTU0503 | Bacteria | Fusobacteria   | Fusobacteria              | Fusobacteriales           | Leptotrichiaceae          | Leptotrichia              | Leptotrichia sp.; HOT_221; AF432138 (96.5%)                                                                         |
| OTU0197 | Bacteria | Fusobacteria   | Fusobacteria              | Fusobacteriales           | Leptotrichiaceae          | Leptotrichia              | Leptotrichia sp.; HOT_498; AY349387 (100%)                                                                          |
| OTU0270 | Bacteria | Fusobacteria   | Fusobacteria              | Fusobacteriales           | Leptotrichiaceae          | Leptotrichia              | Leptotrichia buccalis; HOT_563; L37788 (99.3%)                                                                      |
| OTU1609 | Bacteria | Proteobacteria | Betaproteobacteria        | Neisseriales              | Neisseriaceae             | Kingella                  | Neisseria elongata; HOT_598; L06171 (98.8%)                                                                         |
| OTU0424 | Bacteria | Proteobacteria | Deltaproteobacteria       | Desulfovibrionales        |                           |                           | Desulfovibrio sp.; HOT_040; AY005035 (94.4%)                                                                        |
| OTU0183 | Bacteria | Spirochaetes   | Spirochaetes              | Spirochaetales            | Spirochaetaceae           | Treponema                 | Treponema medium; HOT_667; AF023051 (100%)<br>Treponema vincentii; HOT_029; AF033309 (100%)                         |
| OTU0313 | Bacteria | Spirochaetes   | Spirochaetes              | Spirochaetales            | Spirochaetaceae           | Treponema                 | Treponema socranskii ss 04; HOT_769; AF033308 (100%)                                                                |
| OTU0364 | Bacteria | Spirochaetes   | Spirochaetes              | Spirochaetales            | Spirochaetaceae           | Treponema                 | Treponema socranskii ss paredis; HOT_769; AF033307 (100%)                                                           |
| OTU0423 | Bacteria | Spirochaetes   | Spirochaetes              | Spirochaetales            | Spirochaetaceae           | Treponema                 | Treponema maltophilum; HOT_664; AF023039 (100%)                                                                     |
| OTU0058 | Bacteria | TM7            | TM7_genera_incertae_sedis | TM7_genera_incertae_sedis | TM7_genera_incertae_sedis | TM7_genera_incertae_sedis | TM7 [G-5] sp.; HOT_437; AY331416 (100%)                                                                             |
| OTU0151 | Bacteria | TM7            | TM7_genera_incertae_sedis | TM7_genera_incertae_sedis | TM7_genera_incertae_sedis | TM7_genera_incertae_sedis | TM7 [G-1] sp.; HOT_347; AY005446 (99.3%)                                                                            |
| OTU0226 | Bacteria |                |                           |                           |                           |                           | Fretibacterium fastidiosum; HOT_363; AF125202 (100%)                                                                |
| OTU0210 | Bacteria | Actinobacteria | Actinobacteria            | Actinomycetales           | Corynebacteriaceae        | Corynebacterium           | Corynebacterium durum; HOT_595; Z97069 (100%)                                                                       |
| OTU0107 | Bacteria | Actinobacteria | Actinobacteria            | Actinomycetales           | Micrococcaceae            | Rothia                    | Rothia dentocariosa; HOT_587; M59055 (100%)<br>Rothia aeria; HOT_188; Y13025 (100%)                                 |
| OTU0162 | Bacteria | Bacteroidetes  | Bacteroidia               | Bacteroidales             | Porphyromonadaceae        | Porphyromonas             | Porphyromonas sp.; HOT_279; AY008310 (98.7%)                                                                        |
| OTU0201 | Bacteria | Bacteroidetes  | Flavobacteria             | Flavobacteriales          | Flavobacteriaceae         | Capnocytophaga            | Capnocytophaga granulosa; HOT_325; U41347 (100%)                                                                    |
| OTU0181 | Bacteria | Proteobacteria | Betaproteobacteria        | Burkholderiales           |                           |                           | Lautropia mirabilis; HOT_022; X73223 (100%)                                                                         |
| OTU0242 | Bacteria | Proteobacteria | Betaproteobacteria        | Burkholderiales           |                           |                           | Lautropia mirabilis; HOT_022; AY005030 (100%)                                                                       |
| OTU0992 | Bacteria | Proteobacteria | Betaproteobacteria        | Burkholderiales           |                           |                           | Lautropia mirabilis; HOT_022; X73223 (95.7%)                                                                        |
| OTU1199 | Bacteria | Proteobacteria | Betaproteobacteria        | Burkholderiales           |                           |                           | Lautropia mirabilis; HOT_022; X73223 (94.4%)                                                                        |
| OTU0199 | Bacteria | Proteobacteria | Betaproteobacteria        | Neisseriales              | Neisseriaceae             | Neisseria                 | Neisseria elongata; HOT_598; L06171 (100%)                                                                          |

**Supplementary Table S5** Univariate comparisons of the 110 key OTUs identified by RDA.

| OTU name | Relative abundance (%) (median, range) |                 |                 |                 | P values assessed by Mann-Whitney U test |                 |
|----------|----------------------------------------|-----------------|-----------------|-----------------|------------------------------------------|-----------------|
|          | H-Sal                                  | P-Sal           | H-Sup           | P-Sup           | H-Sal vs. P-Sal                          | H-Sup vs. P-Sup |
| OTU0089  | 0, 0-0.13                              | 0.05, 0-1.82    | 0, 0-0.06       | 0, 0-0.28       | 7.01E-04                                 | 0.001           |
| OTU0054  | 0.08, 0-7.08                           | 1.65, 0-8.75    | 0.24, 0-10.7    | 2.60, 0-12.0    | 3.11E-04                                 | 7.43E-04        |
| OTU0096  | 0.42, 0-2.91                           | 1.87, 0-11.0    | 0.20, 0-3.51    | 0.74, 0-3.63    | 1.63E-04                                 | 0.013           |
| OTU0204  | 0.06, 0-0.87                           | 0.41, 0-2.40    | 0.07, 0-1.55    | 0.25, 0-1.67    | 8.91E-04                                 | 0.018           |
| OTU0200  | 0, 0-1.96                              | 0.16, 0-0.92    | 0, 0-0.38       | 0.07, 0-0.50    | 0.050                                    | 0.005           |
| OTU0290  | 0, 0-0.17                              | 0, 0-0.53       | 0, 0-0.38       | 0.06, 0-1.03    | 0.002                                    | 0.006           |
| OTU0211  | 0, 0-0.19                              | 0.09, 0-0.96    | 0.07, 0-0.63    | 0.26, 0-1.26    | 2.45E-04                                 | 8.50E-05        |
| OTU0456  | 0, 0-0.05                              | 0, 0-0.16       | 0, 0-0.42       | 0.09, 0-0.98    | 0.005                                    | 0.015           |
| OTU0304  | 0, 0-0.46                              | 0.07, 0-0.63    | 0, 0-0.19       | 0.07, 0-0.36    | 0.001                                    | 0.002           |
| OTU0177  | 0, 0-0.40                              | 0.07, 0-0.57    | 0, 0-0.10       | 0, 0-0.26       | 6.87E-05                                 | 0.031           |
| OTU0198  | 0, 0-0.19                              | 0, 0-0.32       | 0, 0-0          | 0, 0-0.29       | 0.004                                    | 3.01E-04        |
| OTU0308  | 0, 0-0.32                              | 0.12, 0-0.76    | 0, 0-0.21       | 0.10, 0-0.56    | 1.32E-04                                 | 0.002           |
| OTU0263  | 0.07, 0-1.84                           | 0.78, 0-2.43    | 0.06, 0-0.56    | 0.17, 0-1.08    | 1.34E-04                                 | 0.006           |
| OTU0115  | 0.43, 0-2.33                           | 0.93, 0.18-4.37 | 0.08, 0-1.09    | 0.21, 0-1.69    | 7.49E-04                                 | 0.005           |
| OTU0287  | 0, 0-0.14                              | 0.04, 0-1.29    | 0, 0-0.14       | 0.05, 0-0.37    | 1.27E-04                                 | 0.008           |
| OTU0413  | 0, 0-0.50                              | 0.08, 0-0.48    | 0, 0-0.19       | 0.04, 0-0.34    | 2.67E-04                                 | 0.026           |
| OTU0312  | 0, 0-0                                 | 0, 0-0.16       | 0, 0-0          | 0, 0-0.14       | 0.003                                    | 0.021           |
| OTU0463  | 0, 0-0                                 | 0, 0-0.13       | 0, 0-0          | 0, 0-0.05       | 0.005                                    | 0.040           |
| OTU0309  | 0, 0-0                                 | 0, 0-0.53       | 0, 0-0          | 0, 0-0.06       | 0.003                                    | 0.011           |
| OTU0146  | 0, 0-0.12                              | 0, 0-3.47       | 0, 0-0.05       | 0, 0-0.59       | 4.52E-04                                 | 0.024           |
| OTU0223  | 0, 0-0.35                              | 0.05, 0-0.38    | 0, 0-1.02       | 0.10, 0-0.39    | 0.011                                    | 0.022           |
| OTU0126  | 0, 0-0.07                              | 0, 0-0.27       | 0, 0-0.06       | 0, 0-0.05       | 0.005                                    | 0.688           |
| OTU0655  | 0, 0-0                                 | 0, 0-0.09       | 0, 0-0.09       | 0, 0-0.10       | 0.021                                    | 0.727           |
| OTU0294  | 0, 0-0                                 | 0, 0-0.10       | 0, 0-0.14       | 0, 0-0.75       | 0.005                                    | 0.078           |
| OTU0288  | 0.45, 0.04-2.24                        | 1.10, 0.16-8.11 | 3.43, 0.13-7.47 | 5.22, 1.09-11.0 | 0.002                                    | 0.009           |
| OTU0196  | 0.04, 0-1.46                           | 0.10, 0-1.06    | 0.37, 0-5.18    | 0.60, 0-2.30    | 0.002                                    | 0.544           |
| OTU0209  | 0, 0-0.05                              | 0, 0-0.10       | 0, 0-0.20       | 0, 0-0.07       | 0.004                                    | 0.634           |
| OTU0462  | 0, 0-0.05                              | 0, 0-0.16       | 0, 0-0.06       | 0, 0-0.09       | 0.006                                    | 0.943           |
| OTU0338  | 0, 0-0.09                              | 0, 0-0.30       | 0, 0-0          | 0, 0-0.11       | 0.024                                    | 0.154           |
| OTU0113  | 0, 0-0.46                              | 0.12, 0-0.45    | 0, 0-0.40       | 0.05, 0-0.35    | 9.13E-04                                 | 0.140           |
| OTU0085  | 0.06, 0-0.46                           | 0.25, 0-1.95    | 0.02, 0-0.31    | 0.05, 0-0.43    | 4.58E-04                                 | 0.300           |
| OTU0222  | 0, 0-0.05                              | 0, 0-0.19       | 0, 0-0.06       | 0, 0-0.17       | 0.012                                    | 0.213           |
| OTU0217  | 0, 0-0.11                              | 0, 0-0.53       | 0, 0-0.21       | 0, 0-0.11       | 7.68E-04                                 | 0.460           |
| OTU0103  | 0, 0-0.31                              | 0.05, 0-0.28    | 0, 0-0          | 0, 0-0.10       | 0.001                                    | 0.078           |
| OTU0099  | 0, 0-0.16                              | 0.04, 0-0.33    | 0, 0-0.28       | 0, 0-0.16       | 0.002                                    | 0.198           |
| OTU0273  | 0, 0-0.49                              | 0.09, 0-0.86    | 0, 0-0.14       | 0, 0-0.20       | 0.001                                    | 0.409           |
| OTU0056  | 0, 0-0                                 | 0, 0-0.23       | 0, 0-0          | 0, 0-0.11       | 0.005                                    | 0.317           |
| OTU0272  | 0, 0-0.11                              | 0, 0-0.13       | 0, 0-0          | 0, 0-0          | 0.029                                    | 1.000           |
| OTU0134  | 0, 0-0.32                              | 0.07, 0-0.52    | 0, 0-0.09       | 0, 0-0.42       | 1.11E-04                                 | 0.324           |
| OTU0356  | 0, 0-0.12                              | 0.05, 0-0.22    | 0, 0-0.13       | 0, 0-0.25       | 0.014                                    | 0.101           |
| OTU0353  | 0, 0-0.35                              | 0.07, 0-0.43    | 0, 0-0.09       | 0, 0-0.06       | 0.009                                    | 0.241           |

|         |                 |                 |              |                 |          |          |
|---------|-----------------|-----------------|--------------|-----------------|----------|----------|
| OTU0255 | 0, 0-0.27       | 0.07, 0-0.66    | 0.08, 0-0.39 | 0.25, 0-1.33    | 6.99E-04 | 0.007    |
| OTU0432 | 0, 0-0.07       | 0, 0-0.95       | 0, 0-0.26    | 0, 0-0.10       | 0.004    | 0.966    |
| OTU0630 | 0, 0-0.09       | 0, 0-0.09       | 0, 0-0       | 0, 0-0          | 0.029    | 1.000    |
| OTU0354 | 0, 0-0.05       | 0, 0-0.41       | 0, 0-0.23    | 0, 0-0.36       | 5.68E-04 | 0.016    |
| OTU0259 | 0, 0-0.18       | 0.04, 0-0.17    | 0, 0-0.16    | 0, 0-0.10       | 0.011    | 0.087    |
| OTU0265 | 0, 0-0.35       | 0.15, 0-0.67    | 0, 0-0.32    | 0.05, 0-0.49    | 5.51E-04 | 0.381    |
| OTU0274 | 0, 0-0.17       | 0.06, 0-0.49    | 0, 0-0.84    | 0.05, 0-0.40    | 0.003    | 0.193    |
| OTU0276 | 0, 0-0.20       | 0, 0-0.59       | 0, 0-0.34    | 0, 0-0.34       | 0.007    | 0.155    |
| OTU0298 | 0, 0-0.06       | 0, 0-0.33       | 0, 0-0.05    | 0, 0-0.05       | 0.011    | 0.531    |
| OTU0307 | 0, 0-0.78       | 0.11, 0-1.63    | 0, 0-0.64    | 0.08, 0-1.12    | 0.001    | 0.079    |
| OTU0366 | 0, 0-0.96       | 0.16, 0-0.72    | 0, 0-0.24    | 0, 0-0.20       | 4.66E-04 | 0.433    |
| OTU0475 | 0, 0-0.06       | 0, 0-0.13       | 0, 0-0.09    | 0, 0-0.07       | 0.022    | 0.169    |
| OTU0489 | 0, 0-0.27       | 0, 0-0.16       | 0, 0-0.13    | 0, 0-0.11       | 0.001    | 0.584    |
| OTU0160 | 0, 0-0.20       | 0.09, 0-1.26    | 0, 0-0.14    | 0, 0-0.09       | 6.53E-05 | 0.844    |
| OTU0236 | 0, 0-0.05       | 0, 0-0.28       | 0, 0-0.06    | 0, 0-0.11       | 0.003    | 0.900    |
| OTU0174 | 0.47, 0-2.85    | 0.14, 0-3.20    | 0, 0-0.21    | 0, 0-0.07       | 0.003    | 0.101    |
| OTU0048 | 0.61, 0.18-2.66 | 0.40, 0-2.53    | 0, 0-0.33    | 0.05, 0-0.48    | 0.084    | 0.011    |
| OTU0186 | 0.13, 0-0.53    | 0.05, 0-0.29    | 0.10, 0-0.85 | 0.02, 0-0.48    | 0.009    | 0.103    |
| OTU0392 | 0.16, 0-1.11    | 0.05, 0-0.29    | 0.05, 0-0.47 | 0.02, 0-0.76    | 6.82E-05 | 0.466    |
| OTU0153 | 0.09, 0-0.91    | 0.04, 0-0.46    | 0, 0-1.25    | 0, 0-0.26       | 0.037    | 0.642    |
| OTU0285 | 0, 0-0.22       | 0, 0-0.06       | 0, 0-0.42    | 0.10, 0-0.31    | 0.232    | 0.004    |
| OTU0305 | 0, 0-0.37       | 0, 0-0.65       | 0, 0-0.13    | 0, 0-0.25       | 0.015    | 0.015    |
| OTU0581 | 0, 0-0          | 0, 0-0          | 0, 0-0.05    | 0, 0-0.17       | 1.000    | 0.025    |
| OTU0415 | 0, 0-0          | 0, 0-0.14       | 0, 0-0.21    | 0, 0-1.03       | 0.011    | 0.059    |
| OTU0171 | 0, 0-0.18       | 0, 0-0.16       | 0, 0-0.18    | 0, 0-0.68       | 0.030    | 0.016    |
| OTU0249 | 0, 0-0.37       | 0, 0-0.68       | 0, 0-0.00    | 0, 0-1.27       | 0.175    | 0.001    |
| OTU0556 | 0, 0-0          | 0, 0-0          | 0, 0-0.05    | 0, 0-0.56       | 1.000    | 0.011    |
| OTU0173 | 0.04, 0-1.42    | 0.17, 0-2.45    | 0.25, 0-6.81 | 0.65, 0-11.1    | 0.031    | 0.019    |
| OTU0334 | 0, 0-0.14       | 0, 0-0.33       | 0.04, 0-0.64 | 0.18, 0-0.69    | 0.050    | 9.00E-04 |
| OTU0615 | 0, 0-0.11       | 0, 0-0.14       | 0.05, 0-0.24 | 0.13, 0-0.73    | 0.041    | 0.006    |
| OTU0108 | 3.71, 0-15.3    | 2.69, 0.20-19.8 | 0.13, 0-1.46 | 0.47, 0-3.17    | 0.690    | 3.20E-04 |
| OTU0179 | 0.36, 0-7.31    | 0.76, 0-12.8    | 0.02, 0-2.80 | 0.55, 0-10.2    | 0.525    | 1.66E-05 |
| OTU0193 | 0.17, 0-6.22    | 0.45, 0-3.89    | 0.11, 0-1.86 | 0.55, 0-14.2    | 0.072    | 0.007    |
| OTU0228 | 0, 0-0.84       | 0.05, 0-0.96    | 0, 0-0.16    | 0.08, 0-1.35    | 0.144    | 3.18E-04 |
| OTU0358 | 0, 0-0.24       | 0.05, 0-0.62    | 0.06, 0-0.90 | 0.24, 0-2.04    | 0.101    | 0.026    |
| OTU0341 | 0.07, 0-0.62    | 0.04, 0-1.27    | 0, 0-0.05    | 0, 0-0.47       | 0.324    | 0.007    |
| OTU0510 | 0, 0-0          | 0, 0-0          | 0, 0-0       | 0, 0-0.17       | 1.000    | 6.33E-05 |
| OTU0492 | 0, 0-0          | 0, 0-0.05       | 0, 0-0       | 0, 0-0.07       | 0.040    | 0.021    |
| OTU0032 | 0.30, 0-2.26    | 0.33, 0-5.85    | 0.05, 0-0.80 | 0.12, 0-2.08    | 0.935    | 0.015    |
| OTU0088 | 0.10, 0-0.97    | 0.13, 0-3.26    | 0.08, 0-1.66 | 0.28, 0.04-1.61 | 0.203    | 3.20E-04 |
| OTU0350 | 0, 0-0.18       | 0, 0-0.28       | 0, 0-0.11    | 0, 0-0.24       | 0.105    | 0.007    |
| OTU0264 | 0, 0-0.40       | 0, 0-0.19       | 0, 0-0       | 0, 0-0.10       | 0.830    | 0.021    |
| OTU0074 | 0.25, 0-3.61    | 0.26, 0-2.60    | 0.26, 0-1.81 | 0.69, 0.15-2.75 | 0.668    | 7.90E-05 |
| OTU0072 | 0.08, 0-1.51    | 0.20, 0-1.87    | 0.63, 0-2.73 | 1.29, 0.42-3.24 | 0.004    | 1.37E-04 |
| OTU0437 | 0, 0-0          | 0, 0-0.25       | 0, 0-0.21    | 0.04, 0-0.34    | 0.021    | 0.006    |

|         |                 |              |                 |                 |       |          |
|---------|-----------------|--------------|-----------------|-----------------|-------|----------|
| OTU0402 | 0, 0-0.09       | 0, 0-0.08    | 0, 0-0          | 0, 0-0.15       | 0.688 | 0.040    |
| OTU0138 | 1.29, 0.19-3.13 | 0.95, 0-4.39 | 0.11, 0-1.57    | 0.46, 0-2.39    | 0.322 | 7.75E-04 |
| OTU0539 | 0, 0-0.06       | 0, 0-0.06    | 0, 0-0.09       | 0, 0-0.28       | 0.557 | 0.022    |
| OTU0503 | 0, 0-0          | 0, 0-0.05    | 0, 0-0.04       | 0, 0-0.10       | 0.154 | 4.88E-04 |
| OTU0197 | 0.06, 0-2.46    | 0.14, 0-1.59 | 0.42, 0-4.00    | 1.26, 0-5.29    | 0.365 | 0.004    |
| OTU0270 | 0, 0-0.27       | 0, 0-0.47    | 0, 0-0.72       | 0.16, 0-2.08    | 0.083 | 0.009    |
| OTU1609 | 0, 0-0.14       | 0, 0-0.06    | 0, 0-0.14       | 0, 0-0.11       | 0.097 | 0.007    |
| OTU0424 | 0, 0-0.18       | 0, 0-0.53    | 0, 0-0.13       | 0, 0-0.33       | 0.070 | 0.010    |
| OTU0183 | 0.07, 0-0.37    | 0.16, 0-0.51 | 0.11, 0-0.66    | 0.19, 0-0.69    | 0.003 | 0.042    |
| OTU0313 | 0, 0-0.18       | 0.04, 0-0.28 | 0.05, 0-0.66    | 0.23, 0-0.78    | 0.021 | 6.44E-04 |
| OTU0364 | 0, 0-0.13       | 0, 0-0.29    | 0.05, 0-0.71    | 0.18, 0-0.60    | 0.169 | 0.005    |
| OTU0423 | 0, 0-0.44       | 0.04, 0-0.33 | 0.05, 0-0.63    | 0.13, 0-0.58    | 0.080 | 0.029    |
| OTU0058 | 0, 0-0.73       | 0.09, 0-2.22 | 0.04, 0-1.56    | 0.31, 0-1.31    | 0.017 | 0.010    |
| OTU0151 | 0, 0-0.99       | 0.07, 0-0.60 | 0.05, 0-1.03    | 0.13, 0-0.94    | 0.036 | 0.003    |
| OTU0226 | 0, 0-0.38       | 0.02, 0-0.37 | 0, 0-0.32       | 0.07, 0-0.34    | 0.031 | 0.006    |
| OTU0210 | 0.08, 0-0.55    | 0.06, 0-1.66 | 0.17, 0-2.42    | 0, 0-1.39       | 0.631 | 0.005    |
| OTU0107 | 0.52, 0-4.98    | 0.44, 0-4.67 | 0.66, 0-9.40    | 0.14, 0-1.60    | 0.723 | 7.80E-05 |
| OTU0162 | 4.59, 0.78-34.1 | 4.22, 0-18.1 | 2.37, 0.05-16.1 | 0.75, 0-6.17    | 0.359 | 8.77E-04 |
| OTU0201 | 0.79, 0.06-2.82 | 0.40, 0-1.90 | 5.90, 0.94-14.3 | 3.04, 0.87-14.9 | 0.007 | 7.49E-04 |
| OTU0181 | 0.33, 0-5.08    | 0.24, 0-1.99 | 0.77, 0.05-6.61 | 0.23, 0-1.87    | 0.700 | 5.10E-04 |
| OTU0242 | 0.06, 0-1.84    | 0.02, 0-2.30 | 0.32, 0-8.75    | 0.05, 0-3.68    | 0.821 | 0.016    |
| OTU0992 | 0, 0-0.25       | 0, 0-0.10    | 0, 0-0.19       | 0, 0-0.07       | 0.607 | 0.006    |
| OTU1199 | 0, 0-0.13       | 0, 0-0.21    | 0.05, 0-0.24    | 0, 0-0.10       | 0.683 | 8.19E-04 |
| OTU0199 | 0.35, 0-4.15    | 0.16, 0-1.40 | 1.89, 0.31-8.71 | 0.97, 0.25-2.83 | 0.036 | 0.003    |

 Enriched in periodontitis patients

 Enriched in healthy controls

**Supplementary Table S6** Distributions of the 21 key OTUs in subgingival plaque of periodontitis.

| <b>OTU name</b> | <b>Relative contribution (%)<sup>1</sup></b> | <b>Relative abundance (%) (median, range)</b> | <b>Prevalence (%)</b> |
|-----------------|----------------------------------------------|-----------------------------------------------|-----------------------|
| <b>OTU0054</b>  | 18.70                                        | 20.7, 0-47.2                                  | 93.3                  |
| <b>OTU0096</b>  | 3.51                                         | 3.05, 0-13.1                                  | 96.7                  |
| <b>OTU0204</b>  | 2.97                                         | 2.51, 0-9.97                                  | 93.3                  |
| <b>OTU0263</b>  | 2.05                                         | 1.96, 0.10-4.96                               | 100.0                 |
| <b>OTU0308</b>  | 0.74                                         | 0.65, 0-1.92                                  | 93.3                  |
| <b>OTU0223</b>  | 0.69                                         | 0.57, 0.05-1.99                               | 100.0                 |
| <b>OTU0115</b>  | 0.50                                         | 0.30, 0-2.02                                  | 96.7                  |
| <b>OTU0290</b>  | 0.35                                         | 0.21, 0-2.41                                  | 66.7                  |
| <b>OTU0287</b>  | 0.33                                         | 0.22, 0-1.86                                  | 76.7                  |
| <b>OTU0304</b>  | 0.32                                         | 0.23, 0-1.06                                  | 90.0                  |
| <b>OTU0200</b>  | 0.32                                         | 0.15, 0-3.30                                  | 76.7                  |
| <b>OTU0413</b>  | 0.27                                         | 0.20, 0-0.83                                  | 93.3                  |
| <b>OTU0211</b>  | 0.24                                         | 0.21, 0-0.89                                  | 83.3                  |
| <b>OTU0177</b>  | 0.19                                         | 0.10, 0-0.73                                  | 83.3                  |
| <b>OTU0198</b>  | 0.13                                         | 0.05, 0-0.76                                  | 53.3                  |
| <b>OTU0312</b>  | 0.12                                         | 0, 0-0.65                                     | 40.0                  |
| <b>OTU0456</b>  | 0.11                                         | 0.06, 0-0.57                                  | 63.3                  |
| <b>OTU0146</b>  | 0.09                                         | 0, 0-1.25                                     | 30.0                  |
| <b>OTU0089</b>  | 0.08                                         | 0.08, 0-0.25                                  | 63.3                  |
| <b>OTU0463</b>  | 0.07                                         | 0, 0-0.37                                     | 36.7                  |
| <b>OTU0309</b>  | 0.03                                         | 0, 0-0.16                                     | 43.3                  |
| <b>Total</b>    | 31.80                                        | /                                             | /                     |

45 <sup>1</sup> Relative contribution of an OTU in subgingival plaque of patients was calculated as percentage of the reads of this OTU to all reads in P-Sub group.

**Supplementary Table S7** Diagnostic values of the 21 periodontitis-enriched OTUs and *F.*

50 *alocis*-centered co-occurrence group.

| Habitat                                        | OTU number | Area under ROC curve | Cut-off point (%) | Sensitivity | Specificity | Likelihood ratio <sup>1</sup> | P value <sup>1</sup> |
|------------------------------------------------|------------|----------------------|-------------------|-------------|-------------|-------------------------------|----------------------|
| <b>Saliva</b>                                  | OTU0263    | 0.786                | 0.32              | 0.73        | 0.80        | 18.1                          | 2.11E-05             |
|                                                | OTU0204    | 0.748                | 0.10              | 0.83        | 0.60        | 12.5                          | 4.14E-04             |
|                                                | OTU0308    | 0.777                | 0.04              | 0.80        | 0.70        | 15.9                          | 6.68E-05             |
|                                                | OTU0177    | 0.776                | 0.02              | 0.73        | 0.80        | 18.1                          | 2.11E-05             |
|                                                | OTU0054    | 0.769                | 0.37              | 0.77        | 0.73        | 15.7                          | 7.35E-05             |
|                                                | OTU0413    | 0.748                | 0.04              | 0.67        | 0.83        | 16.3                          | 5.47E-05             |
|                                                | OTU0096    | 0.783                | 0.76              | 0.77        | 0.77        | 18.0                          | 2.23E-05             |
|                                                | OTU0198    | 0.677                | 0.02              | 0.47        | 0.87        | 8.3                           | 3.99E-03             |
|                                                | OTU0287    | 0.742                | 0.02              | 0.57        | 0.90        | 15.8                          | 6.96E-05             |
|                                                | OTU0200    | 0.637                | 0.12              | 0.57        | 0.80        | 8.8                           | 3.01E-03             |
|                                                | OTU0223    | 0.669                | 0.02              | 0.57        | 0.77        | 7.1                           | 7.66E-03             |
|                                                | OTU0304    | 0.723                | 0.07              | 0.50        | 0.93        | 15.2                          | 9.45E-05             |
|                                                | OTU0089    | 0.726                | 0.02              | 0.60        | 0.80        | 10.4                          | 1.29E-03             |
|                                                | OTU0312    | 0.633                | 0.02              | 0.27        | 1.00        | 12.3                          | 4.47E-04             |
|                                                | OTU0463    | 0.617                | 0.02              | 0.23        | 1.00        | 10.6                          | 1.11E-03             |
|                                                | OTU0115    | 0.753                | 0.56              | 0.73        | 0.73        | 13.6                          | 2.28E-04             |
|                                                | OTU0290    | 0.687                | 0.02              | 0.47        | 0.90        | 10.6                          | 1.15E-03             |
|                                                | OTU0211    | 0.767                | 0.07              | 0.60        | 0.83        | 12.5                          | 4.14E-04             |
|                                                | OTU0456    | 0.637                | 0.02              | 0.30        | 0.97        | 8.6                           | 3.28E-03             |
|                                                | OTU0146    | 0.690                | 0.13              | 0.40        | 1.00        | 19.7                          | 9.22E-06             |
| OTU0309                                        | 0.633      | 0.02                 | 0.27              | 1.00        | 12.3        | 4.47E-04                      |                      |
| <i>F. alocis</i> -centered co-occurrence group |            | 0.817                | 2.11              | 0.87        | 0.73        | 23.8                          | 1.10E-06             |
| <b>Supragingival Plaque</b>                    | OTU0263    | 0.703                | 0.15              | 0.60        | 0.77        | 8.5                           | 3.50E-03             |
|                                                | OTU0204    | 0.677                | 0.15              | 0.67        | 0.67        | 6.8                           | 9.14E-03             |
|                                                | OTU0308    | 0.719                | 0.05              | 0.67        | 0.73        | 9.9                           | 1.63E-03             |
|                                                | OTU0177    | 0.629                | 0.05              | 0.40        | 0.90        | 7.6                           | 5.85E-03             |
|                                                | OTU0054    | 0.752                | 0.36              | 0.87        | 0.57        | 13.1                          | 2.99E-04             |
|                                                | OTU0413    | 0.650                | 0.02              | 0.57        | 0.73        | 5.7                           | 1.74E-02             |
|                                                | OTU0096    | 0.686                | 0.44              | 0.67        | 0.77        | 11.8                          | 5.96E-04             |
|                                                | OTU0198    | 0.683                | 0.02              | 0.37        | 1.00        | 17.7                          | 2.53E-05             |
|                                                | OTU0287    | 0.679                | 0.07              | 0.43        | 0.93        | 11.7                          | 6.15E-04             |
|                                                | OTU0200    | 0.691                | 0.02              | 0.63        | 0.77        | 10.1                          | 1.50E-03             |
|                                                | OTU0223    | 0.666                | 0.05              | 0.73        | 0.60        | 6.9                           | 8.47E-03             |
|                                                | OTU0304    | 0.708                | 0.10              | 0.43        | 0.97        | 15.4                          | 8.84E-05             |
|                                                | OTU0089    | 0.687                | 0.02              | 0.43        | 0.93        | 11.7                          | 6.15E-04             |
|                                                | OTU0312    | 0.583                | 0.02              | 0.17        | 1.00        | 7.4                           | 6.57E-03             |
|                                                | OTU0463    | 0.567                | 0.02              | 0.13        | 1.00        | 5.8                           | 1.57E-02             |
|                                                | OTU0115    | 0.710                | 0.15              | 0.70        | 0.73        | 11.7                          | 6.37E-04             |
|                                                | OTU0290    | 0.690                | 0.10              | 0.47        | 0.93        | 13.4                          | 2.46E-04             |
|                                                | OTU0211    | 0.794                | 0.10              | 0.83        | 0.73        | 20.7                          | 5.24E-06             |
|                                                | OTU0456    | 0.676                | 0.05              | 0.70        | 0.70        | 9.9                           | 1.68E-03             |
|                                                | OTU0146    | 0.601                | 0.02              | 0.23        | 0.97        | 5.8                           | 1.64E-02             |
| OTU0309                                        | 0.600      | 0.02                 | 0.20              | 1.00        | 9.0         | 2.72E-03                      |                      |
| <i>F. alocis</i> -centered co-occurrence group |            | 0.739                | 1.58              | 0.77        | 0.63        | 10.1                          | 1.50E-03             |

<sup>1</sup> Likelihood ratio and P values were assessed by Chi-Square test

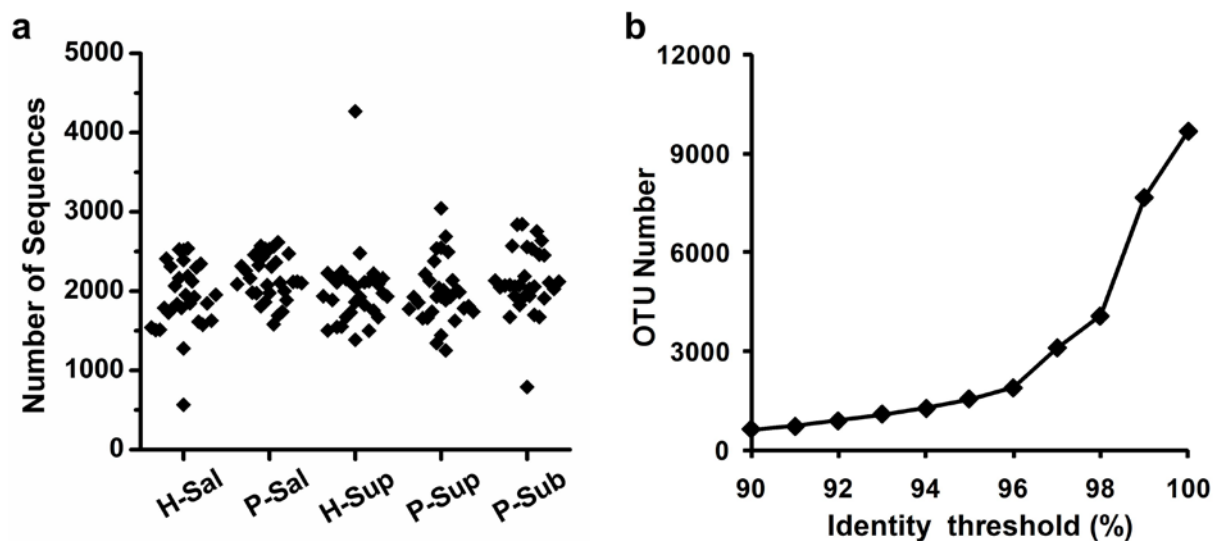

**Supplementary Figure S1** (a) The number of sequences for each sample. (b) The numbers of  
 55 OTUs identified at several different similarity levels. The x-axis shows the identity, the y-axis  
 shows the number of OTUs. OTUs were delineated at 96% similarity level because higher  
 thresholds generated a dramatic increase of OTU numbers, which might represent the  
 microdiversity at subspecies level.

60

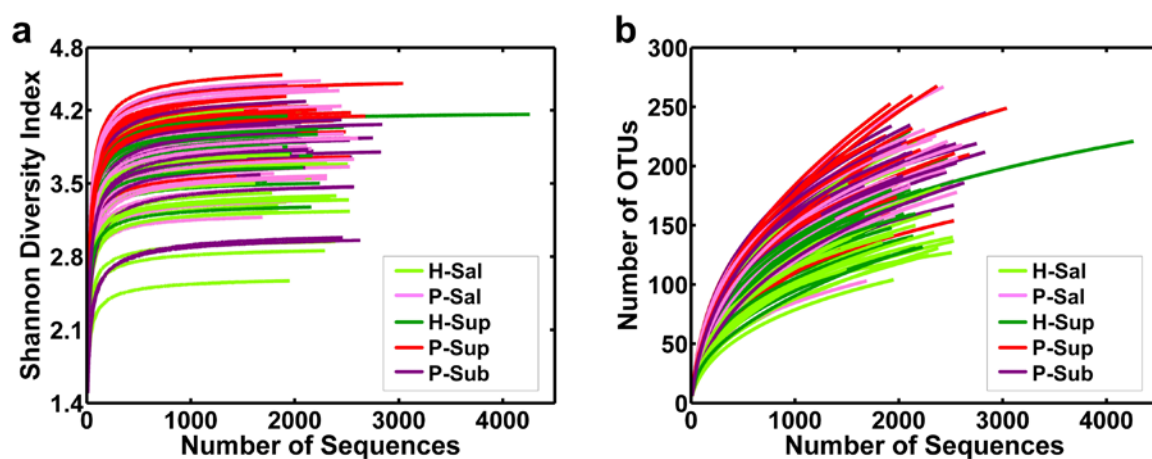

**Supplementary Figure S2** Shannon diversity index curves (a) and rarefaction curves (b) of  
 oral microbiota in five groups.

65

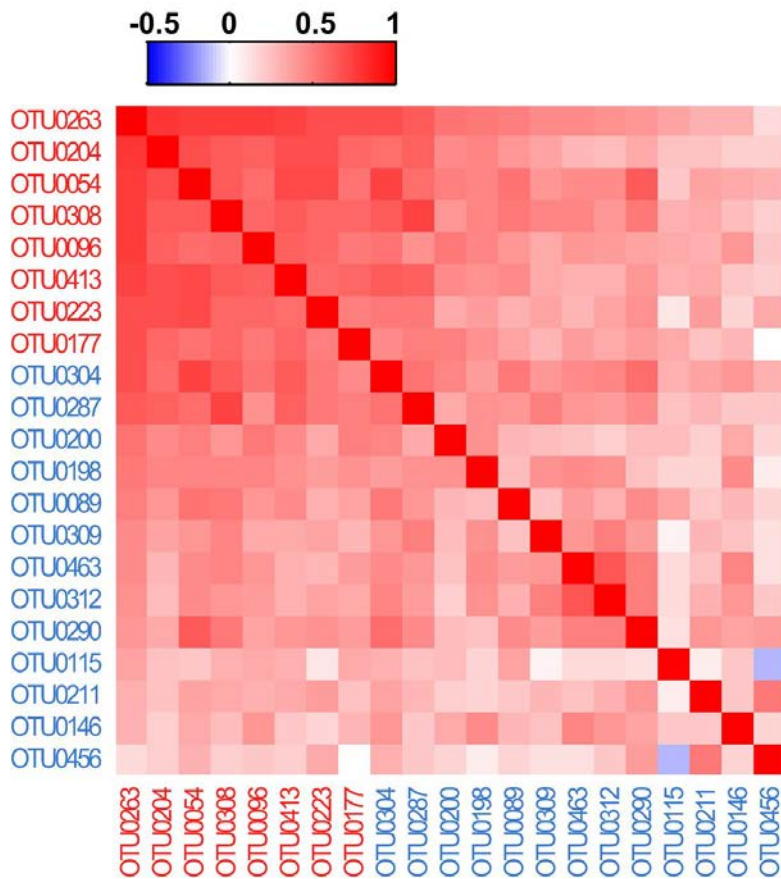

**Supplementary Figure S3** Heat map of the correlation between 21 key OTUs in the oral  
 70 microbiota. The color of the spot corresponds to the pairwise Spearman's correlation  
 coefficient of each two OTUs calculated based on their normalized relative abundances in all  
 150 samples. The eight members of *F. alocis*-centered co-occurrence group were colored in  
 red, and others were colored in blue.

75
